# Supplementary material for: Attenuated total reflection Fourier-transform infrared spectroscopy for the prediction of hormone concentrations in plants
Source: Royal Society of Chemistry journal article supplement (doi:10.1039/d3an01817b), 2024-01-01
Supplement: d3an01817b1.pdf [file d3an01817b1.pdf]

## **Electronic Supplementary Information**

### **Attenuated total reflection Fourier-transform infrared spectroscopy for the prediction of hormone concentrations in plants**

Claire A Holden<sup>1</sup>, Martin McAinsh<sup>1</sup>, Jane E Taylor<sup>1</sup>, Paul Beckett<sup>2</sup>, Alfonso Albacete<sup>3,4</sup>,  
Cristina Martínez-Andújar<sup>4</sup>, Camilo L. M. Morais<sup>5,6</sup>, Francis L Martin<sup>7,8\*</sup>

<sup>1</sup> Lancaster Environment Centre, Lancaster University, UK

<sup>2</sup> Phlorum Ltd, UK

<sup>3</sup> Institute for Agro-Environmental Research and Development of Murcia (IMIDA),  
Department of Plant Production and Agrotechnology, C/ Mayor s/n, E-30150 La Alberca,  
Murcia, Spain

<sup>4</sup> CEBAS-CSIC. Department of Plant Nutrition. Campus Universitario de Espinardo, E-  
30100 Murcia, Spain

<sup>5</sup> Center for Education, Science and Technology of the Inhamuns Region, State University of Ceará,  
Tauá 63660-000, Brazil

<sup>6</sup> Graduate Program in Chemistry, Institute of Chemistry, Federal University of Rio Grande  
do Norte, Natal 59072-970, Brazil

<sup>7</sup> Department of Cellular Pathology, Blackpool Teaching Hospitals NHS Foundation Trust,  
Whinney Heys Road, Blackpool FY3 8NR, UK

<sup>8</sup> Biocel UK Ltd., Hull HU10 6TS, UK

\*Corresponding author: Francis L Martin; Email: [francis.martin2@nhs.net](mailto:francis.martin2@nhs.net)

**Table S1:** Lighting conditions within each Snijder cabinet

| <i>Light Quality</i>                                                          | <b>‘Light’ Groups:<br/>LC, LD, LN and<br/>LLN</b> | <b>‘Shade’ Groups:<br/>SC, SD, SN and<br/>SLN</b> |
|-------------------------------------------------------------------------------|---------------------------------------------------|---------------------------------------------------|
| <i>PFD-R<sub>(700-780 nm)</sub></i>                                           | 72.51                                             | 49.28                                             |
| <i>PFD-FR<sub>(600-700 nm)</sub></i>                                          | 12.89                                             | 116.5                                             |
| <i>photosynthetic photon<br/>flux density PPF<sub>(400-<br/>700 nm)</sub></i> | 189.8                                             | 124.7                                             |
| <i>PFD-UV<sub>(380-400 nm)</sub></i>                                          | 0.5677                                            | 0.4402                                            |
| <i>PFD-B<sub>(400-500 nm)</sub></i>                                           | 33.93                                             | 21.58                                             |
| <i>PFD-G<sub>(500-600 nm)</sub></i>                                           | 83.40                                             | 53.87                                             |
| <i>peak wavelength <math>\lambda_p</math> /<br/>nm</i>                        | 545                                               | 741                                               |
| <i>peak wavelength value<br/><math>\lambda_p V / mWm^{-2}nm^{-1}</math></i>   | 827.7                                             | 576.0                                             |
| <i>Irradiance</i>                                                             | 43.2                                              | 45.8                                              |
| <i>Illuminance/ lux.</i>                                                      | 15128                                             | 9617                                              |

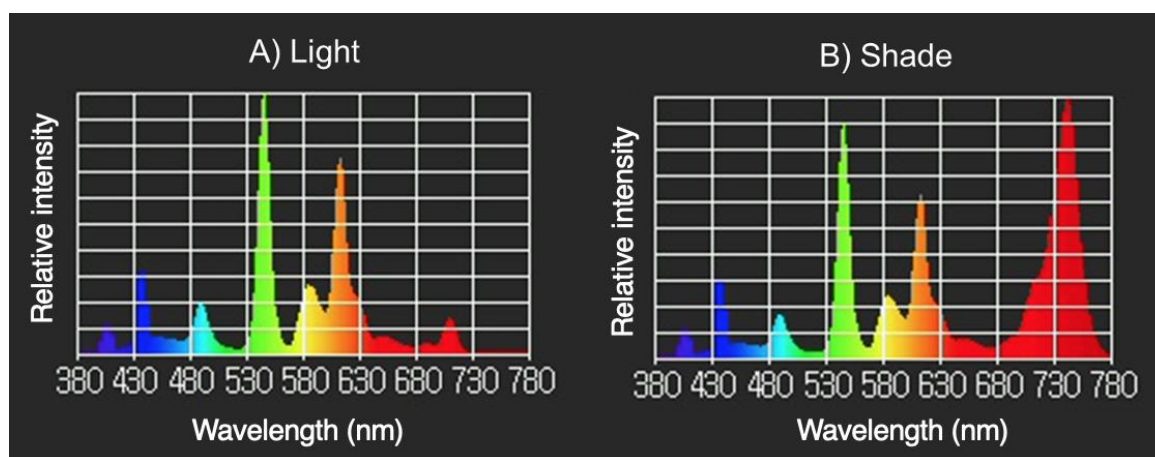

**Figure S1:** Spectra from a) ‘Light’ b) ‘Shade’ cabinets, providing red: far-red ratios of 5.6 and 0.4 respectively.

**Table S2:** Reagents used for Hoagland's solution. Full strength Hoagland's solution was made using 100 mL of solution A, 100 mL of solution B and 10 mL of solution C in 10 L of deionised water.

| <i>Solution</i>   | <b>Reagent</b>                                                                     | <b>Concentration/ gL<sup>-1</sup></b> |
|-------------------|------------------------------------------------------------------------------------|---------------------------------------|
| <i>A (100 mL)</i> | NH <sub>4</sub> NO <sub>3</sub>                                                    | 8.000                                 |
|                   | Ca(NO <sub>3</sub> ) <sub>2</sub> ·4H <sub>2</sub> O                               | 82.600                                |
|                   | KNO <sub>3</sub>                                                                   | 35.700                                |
| <i>B (100 mL)</i> | KNO <sub>3</sub>                                                                   | 5.000                                 |
|                   | KH <sub>2</sub> PO <sub>4</sub>                                                    | 27.400                                |
|                   | MgSO <sub>4</sub> ·7H <sub>2</sub> O<br>*added first                               | 24.600                                |
|                   | MnSO <sub>4</sub> ·5H <sub>2</sub> O                                               | 0.053                                 |
|                   | H <sub>3</sub> BO <sub>3</sub>                                                     | 0.140                                 |
|                   | CuSO <sub>4</sub> ·5H <sub>2</sub> O                                               | 0.015                                 |
|                   | (NH <sub>4</sub> ) <sub>6</sub> Mo <sub>7</sub> O <sub>24</sub> ·4H <sub>2</sub> O | 0.008                                 |
|                   | ZnSO <sub>4</sub> ·7H <sub>2</sub> O                                               | 0.060                                 |
| <i>C (10 mL)</i>  | Fe-EDTA                                                                            | 36.71                                 |

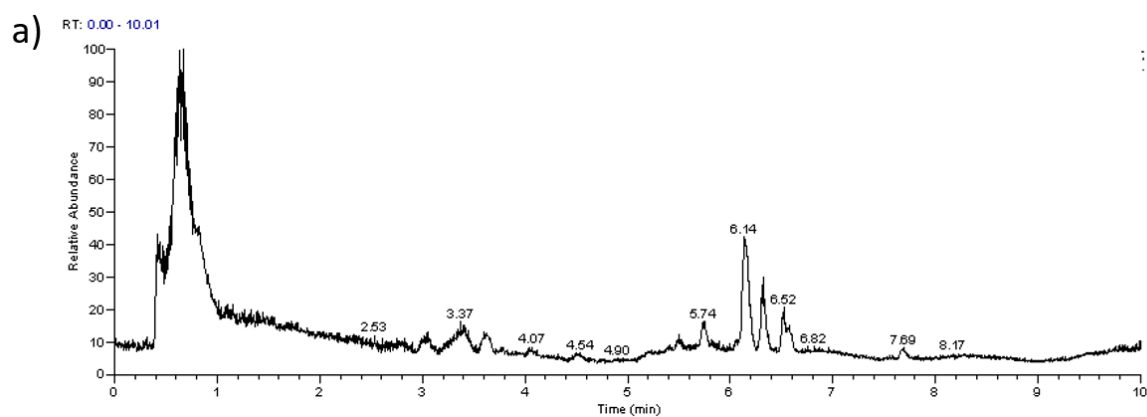

#### Quan Component's Peak Report

Component Name: SA

b)

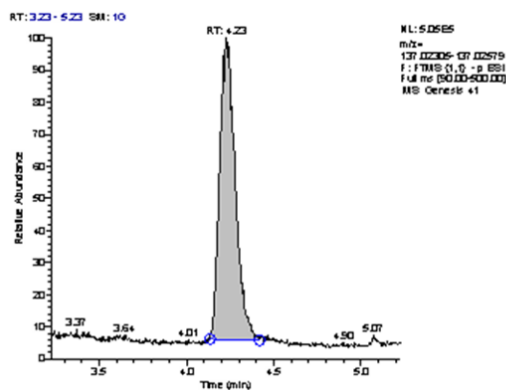

**Figure S2:** Total ion current and mass chromatogram (m/z 137.02442) for salicylic acid.

**Table S3:** Hormone descriptions and molecular ion masses

| <i>Hormone class</i>      | <b>Abbreviation</b> | <b>Hormone</b>                        | <b>Molecular formula</b>                                      | <b>[M-H]<sup>-</sup></b> |
|---------------------------|---------------------|---------------------------------------|---------------------------------------------------------------|--------------------------|
| <i>Ethylene precursor</i> | ACC                 | 1-Aminocyclopropane-1-carboxylic acid | C <sub>4</sub> H <sub>7</sub> NO <sub>2</sub>                 | 100.04040                |
| <i>Cytokinins</i>         | t-Z                 | <i>trans</i> -Zeatin                  | C <sub>10</sub> H <sub>13</sub> N <sub>5</sub> O              | 218.10473                |
|                           | t-ZR                | <i>trans</i> -Zeatin riboside         | C <sub>15</sub> H <sub>21</sub> N <sub>5</sub> O <sub>5</sub> | 350.14699                |
|                           | iP                  | Isopentenyladenine                    | C <sub>10</sub> H <sub>13</sub> N <sub>5</sub>                | 202.10982                |
| <i>Gibberellins</i>       | GA1                 | Gibberellin A1                        | C <sub>19</sub> H <sub>24</sub> O <sub>6</sub>                | 347.15001                |
|                           | GA3                 | Gibberellin A3                        | C <sub>19</sub> H <sub>22</sub> O <sub>6</sub>                | 345.13436                |
|                           | GA4                 | Gibberellin A4                        | C <sub>19</sub> H <sub>24</sub> O <sub>5</sub>                | 331.15510                |
| <i>Auxins</i>             | IAA                 | Indole-3-acetic acid                  | C <sub>10</sub> H <sub>9</sub> NO <sub>2</sub>                | 174.05605                |
| <i>Abscisic acid</i>      | ABA                 | Abscisic acid                         | C <sub>15</sub> H <sub>20</sub> O <sub>4</sub>                | 263.12888                |
| <i>Salicylates</i>        | SA                  | Salicylic acid                        | C <sub>7</sub> H <sub>6</sub> O <sub>3</sub>                  | 137.02442                |
| <i>Jasmonates</i>         | JA                  | Jasmonic acid                         | C <sub>12</sub> H <sub>18</sub> O <sub>3</sub>                | 209.11832                |

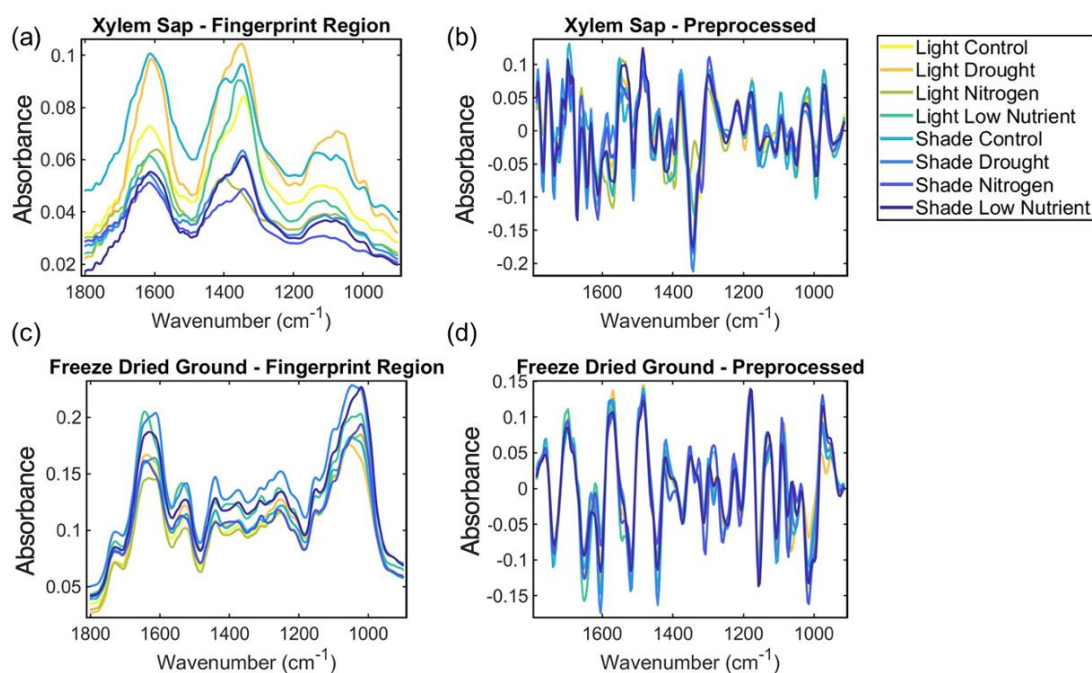

**Figure S3:** (a) Raw and (b) pre-processed class means spectra in the fingerprint region from xylem sap, (c) Raw and (d) pre-processed (Savitzky–Golay 2<sup>nd</sup> differentiation,  $n=9$ , and vector normalisation) class means spectra in the fingerprint region from freeze-dried ground leaves. Each class is grouped by treatment; Light Control (LC), Light Drought (LD), Light Nitrogen (LN), Light Low Nitrogen (LLN), Shade Control (SC), Shade Drought (SD), Shade Nitrogen (SN) and Shade Low Nitrogen (SLN).

**Table S4:** SVM parameters for classification

|                                   | Cost    | Gamma ( $\gamma$ ) | Number of support vectors ( $N_{SV}$ ) |
|-----------------------------------|---------|--------------------|----------------------------------------|
| <i>Xylem Sap</i>                  | 31.6228 | 3.1623             | 314                                    |
| <i>Freeze-dried ground leaves</i> | 100     | 3.1623             | 194                                    |

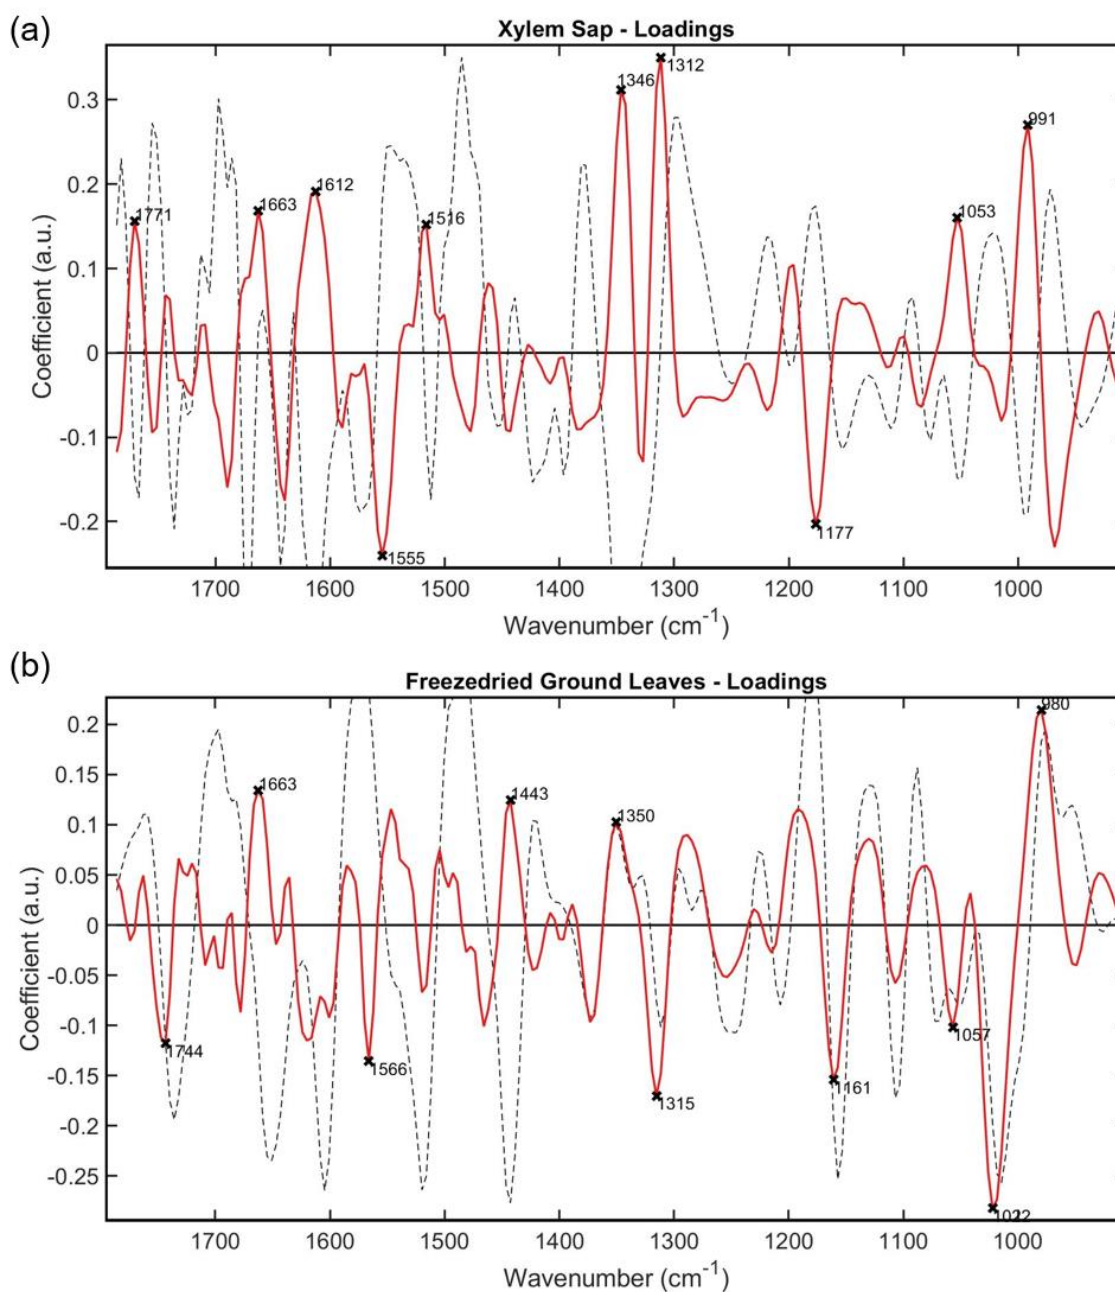

**Figure S4:** Loadings from spectra of a) xylem sap and b) freeze-dried ground leaf samples. These are the key wavenumbers which differentiate spectral profiles of different treatment groups from one another. The red line represents the PCA loadings and the black-dashed line represents the total mean spectrum, scaled to fit.

**Table S5:** PCA-loadings and biomarkers: key wavenumbers and compounds, which differentiate ATR-FTIR spectral profiles of plants from different growth conditions for both xylem sap and freeze-dried ground sample types.

| Sample Type                | Wavelength / cm | Tentative Molecular Assignment                                                                                          | Reference                                                 |
|----------------------------|-----------------|-------------------------------------------------------------------------------------------------------------------------|-----------------------------------------------------------|
| Xylem sap                  | 1770.65         | $\nu_1$ symmetric stretching of C=O in the carboxylic acid of pectin or ester bond of triacylglycerol                   | (Nozahic and Amziane, 2012)                               |
|                            | 1662.64         | The N-C=O group of proteins. Amide I vibrations, specifically associated with disordered secondary structures or turns. | (Belfer <i>et al.</i> , 1998; Shivu <i>et al.</i> , 2013) |
|                            | 1612.49         | Amide I                                                                                                                 | (Jin <i>et al.</i> , 2018)                                |
|                            | 1554.62         | C-N stretching and N-H bending (Amide II vibration); C-O-O <sup>-</sup> asymmetric stretching of proteins and glutamate | (Moskal <i>et al.</i> , 2019)                             |
|                            | 1516.05         | Amide II vibrations of proteins                                                                                         | (Talari <i>et al.</i> , 2017)                             |
|                            | 1346.31         | Cellulose                                                                                                               | (Gorzsas, 2020)                                           |
|                            | 1311.59         | Amide III vibrations of proteins                                                                                        | (Talari <i>et al.</i> , 2017)                             |
|                            | 1176.58         | C-O stretch vibration of tannins                                                                                        | (Falcão and Araújo, 2013)                                 |
|                            | 1053.13         | Starch, $\nu$ C-O and $\delta$ C-O of carbohydrates                                                                     | (Talari <i>et al.</i> , 2017; Jin <i>et al.</i> , 2018)   |
|                            | 991.41          | C-O ribose                                                                                                              | (Camilo L. M. Morais <i>et al.</i> , 2017)                |
| Freeze-dried ground leaves | 1743.53         | Ester C=O stretch: triglycerides                                                                                        | (Talari <i>et al.</i> , 2017)                             |
|                            | 1662.52         | The N-C=O group of proteins. Amide I vibrations, specifically associated with disordered secondary structures or turns. | (Belfer <i>et al.</i> , 1998; Shivu <i>et al.</i> , 2013) |
|                            | 1566.09         | N-H bending; C-N stretching (Amide II band of proteins)                                                                 | (Rana <i>et al.</i> , 2018)                               |
|                            | 1442.65         | Pectin                                                                                                                  | (Sharma and Uttam, 2018)                                  |
|                            | 1350.08         | Phosphodiester stretching bands region (for absorbances due to starch)                                                  | (Talari <i>et al.</i> , 2017)                             |
|                            | 1315.36         | Cellulose                                                                                                               | (Sharma and Uttam, 2018)                                  |
|                            | 1161.06         | C-OH groups of serine, threonine and tyrosine of proteins, C-O stretching and hydrogen bonding                          | (Talari <i>et al.</i> , 2017)                             |
|                            | 1056.92         | Stretching C-O deoxyribose                                                                                              | (Talari <i>et al.</i> , 2017)                             |
|                            | 1022.2          | Starch                                                                                                                  | (Talari <i>et al.</i> , 2017)                             |
|                            | 979.769         | C-OH stretching of secondary alcohols and C-O-C vibrations of polysaccharides                                           | (Ajitha <i>et al.</i> , 2015)                             |

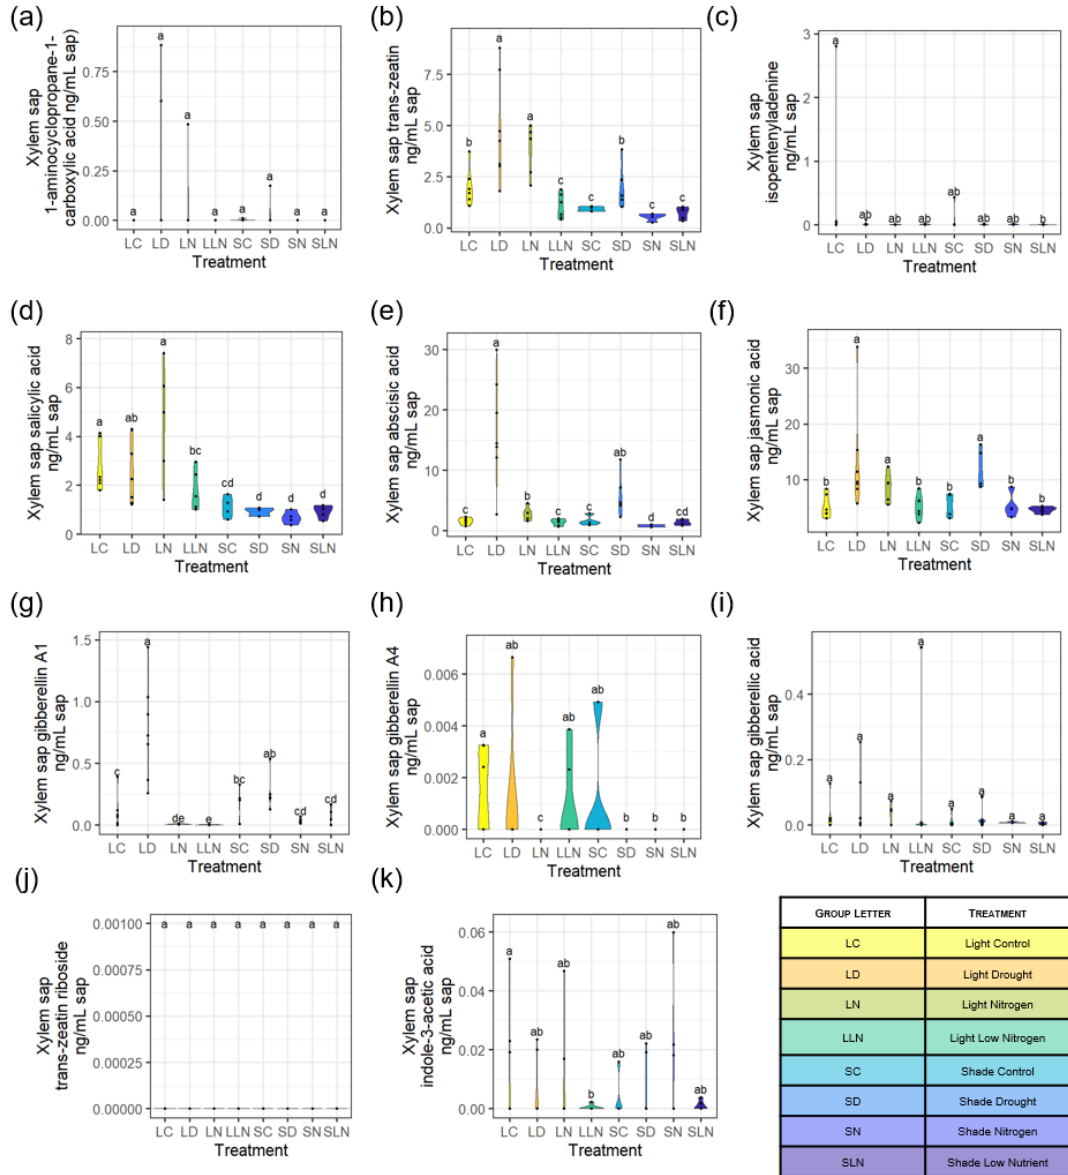

**Figure S5:** Hormone profiles from xylem sap measured using UHPLC– HRMS in  $\text{ng}\cdot\text{ml}^{-1}$  sap for a) 1-amino-cyclopropanecarboxylic acid (ACC), b) *trans*-Zeatin (*tZ*), c) isopentenyl-adenine (*iP*), d) salicylic acid (*SA*), e) abscisic acid (*ABA*), f) jasmonic acid (*JA*), g) gibberellin A1 (*GA*<sub>1</sub>), gibberellin A4 (*GA*<sub>4</sub>), gibberellic acid (*GA*<sub>3</sub>), *trans*-zeatin riboside (*tZR*), and indole-3-acetic acid (*IAA*). *ABA* concentration was highest in the drought categories; LD had  $\sim 17 \text{ ng}\cdot\text{ml}^{-1}$  sap of *ABA* compared with SD which had  $\sim 7 \text{ ng}\cdot\text{ml}^{-1}$  sap, whilst the other categories ranged between  $\sim 1$  and  $3 \text{ ng}\cdot\text{ml}^{-1}$  sap. Shade plants had lower xylem *SA* levels than light ones, in the range of  $0.7\text{--}1.1 \text{ ng}\cdot\text{ml}^{-1}$  sap compared with  $1.6\text{--}4.5 \text{ ng}\cdot\text{ml}^{-1}$  sap respectively. Xylem sap levels of *GA*<sub>1</sub> were approximately three times higher in LD than most other treatment groups, although this was not significantly different to the other drought category, SD, due to high variation.

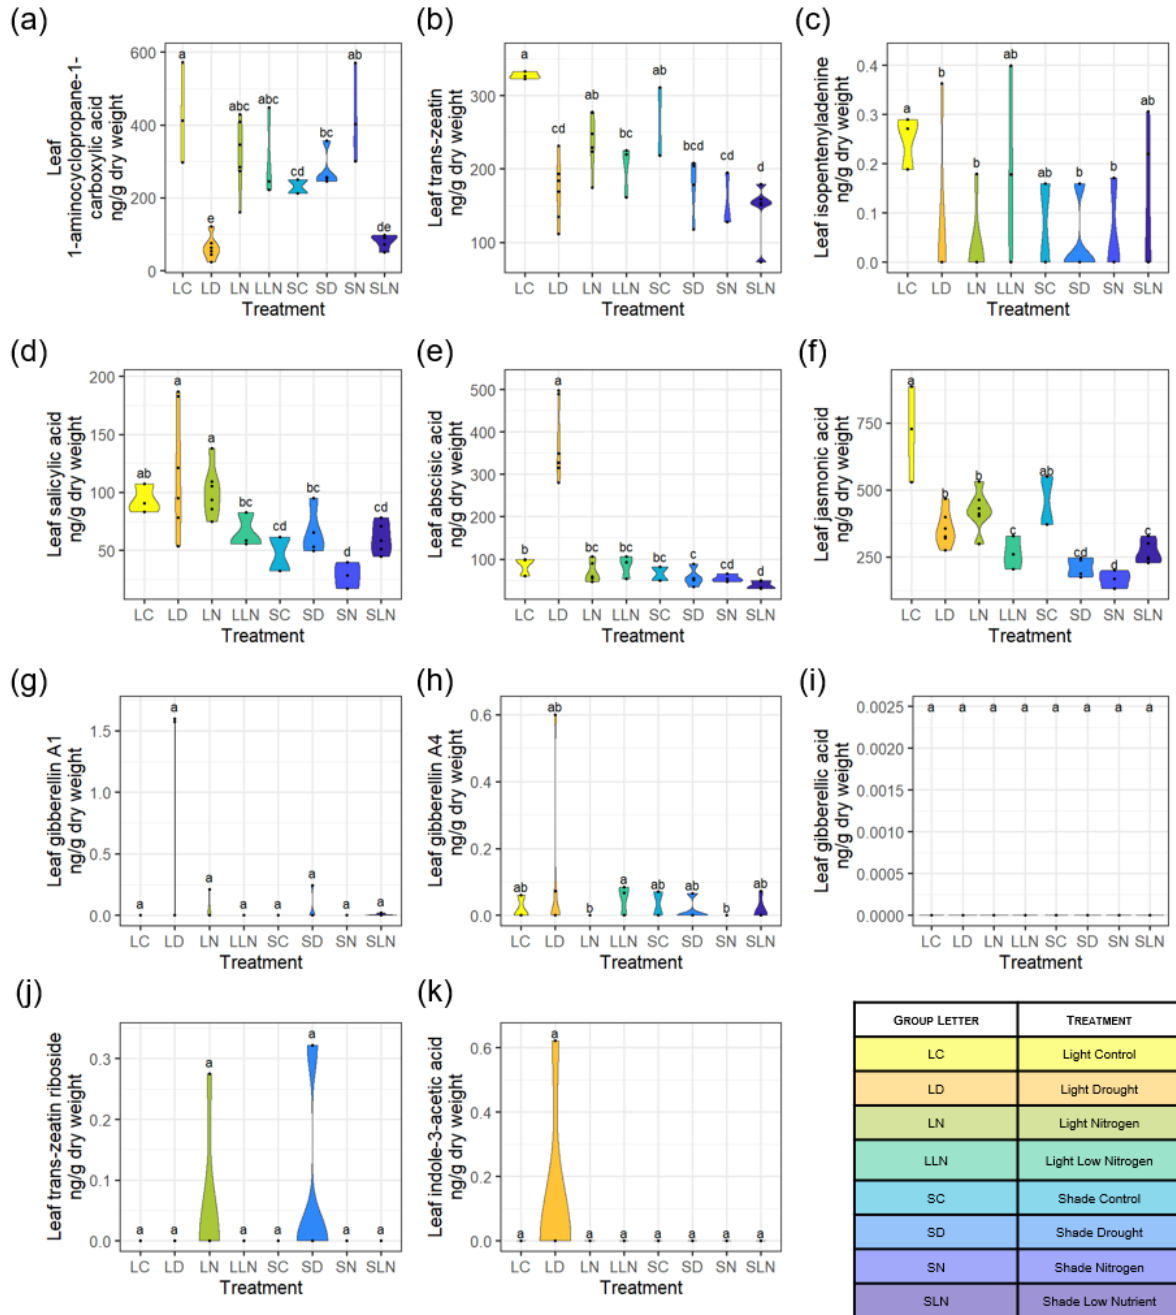

**Figure S6:** Hormone profiles from freeze-dried ground leaves measured using UHPLC–HRMS in  $\text{ng}\cdot\text{g}^{-1}$  dry weight for a) 1-amino-cyclopropanecarboxylic acid (ACC), b) *trans*-Zeatin (tZ), c) isopentenyl-adenine (iP), d) salicylic acid (SA), e) abscisic acid (ABA), f) jasmonic acid (JA), g) gibberellin A1 ( $\text{GA}_1$ ), gibberellin A4 ( $\text{GA}_4$ ), gibberellic acid ( $\text{GA}_3$ ), *trans*-zeatin riboside (tZR), and indole-3-acetic acid (IAA). Leaf ABA levels (Figure S5) were approximately quadruple in LD than those of the other categories. Plants grown under LC treatment category registered approximately 4.5-fold higher of leaf tZ than those in SLN. Leaf JA concentration was significantly higher in the light control group LC ( $\sim 710 \text{ ng}\cdot\text{g}^{-1}$  dry weight) compared to all other groups (ranging  $170\text{--}420 \text{ ng}\cdot\text{g}^{-1}$  dry weight), except the shade control group SC ( $\sim 460 \text{ ng}\cdot\text{g}^{-1}$  dry weight). The highest iP hormone concentration was found in leaves of category LC, at  $0.25 \text{ ng}\cdot\text{g}^{-1}$  dry weight. This value was significantly higher compared to groups LD, LN, SD, SN (ranging  $0.03\text{--}0.6 \text{ ng}\cdot\text{g}^{-1}$  dry weight), with the other groups falling in between.



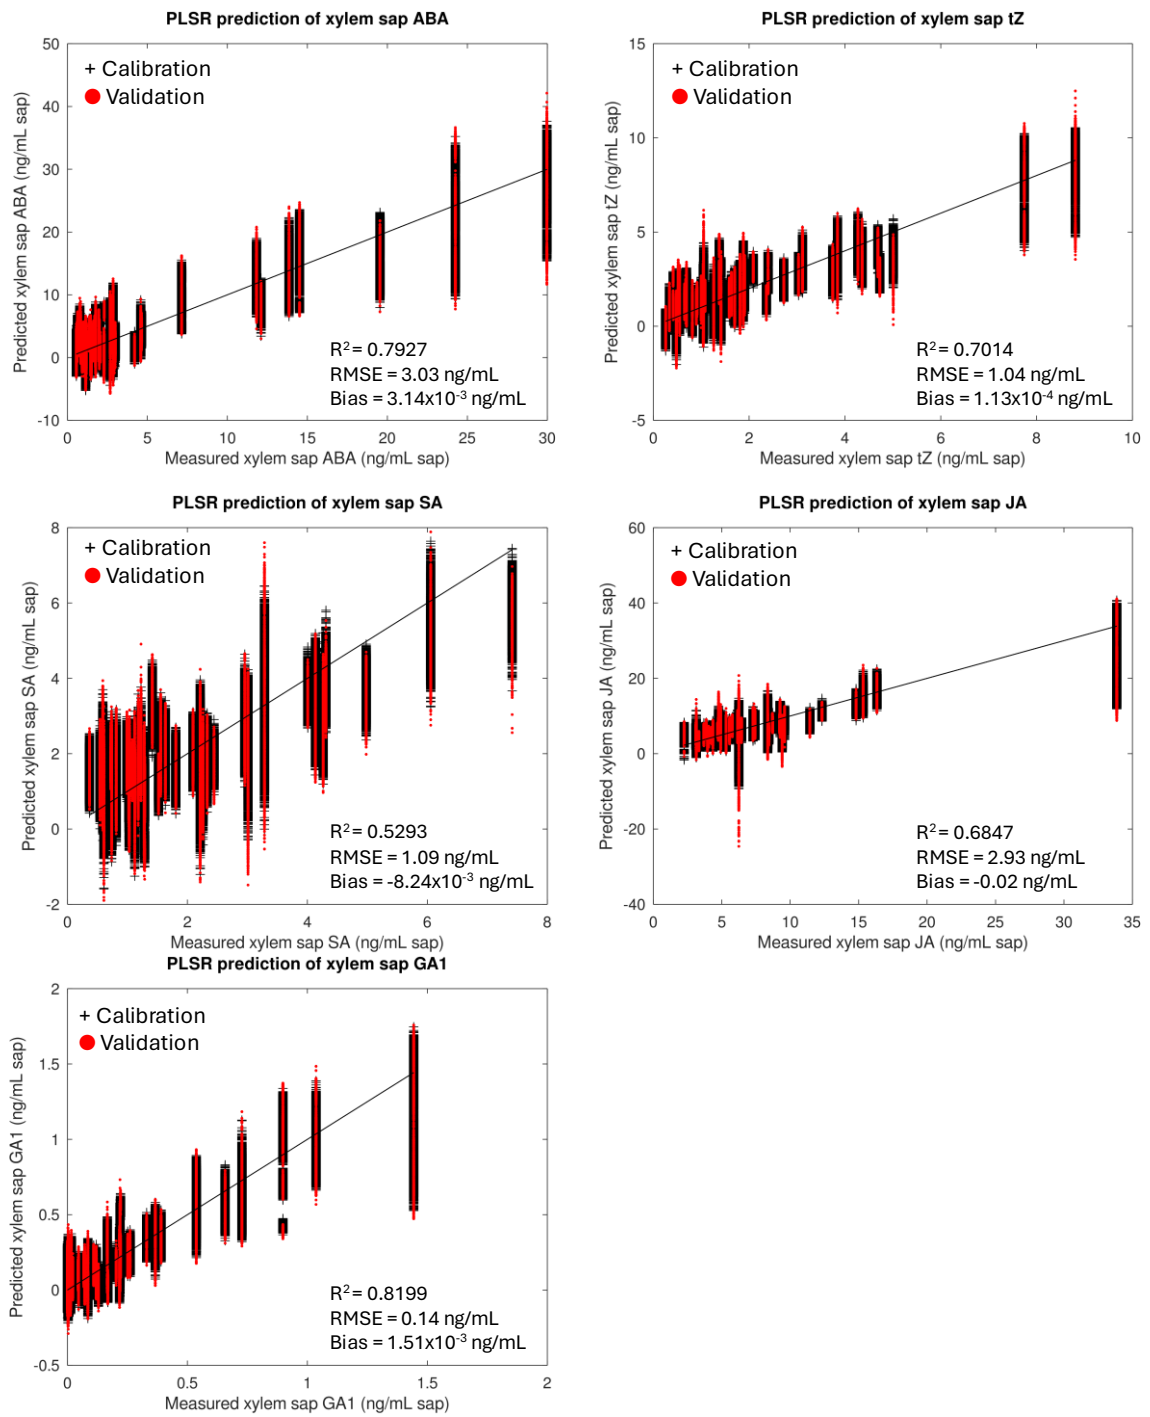

**Figure S7:** PLS regression graphs for prediction of plant hormones from xylem sap. Validation was performed by Monte-Carlo cross-validation with 20% of samples left-out for validation during 1000 iterations. All models were built using 10 latent variables.

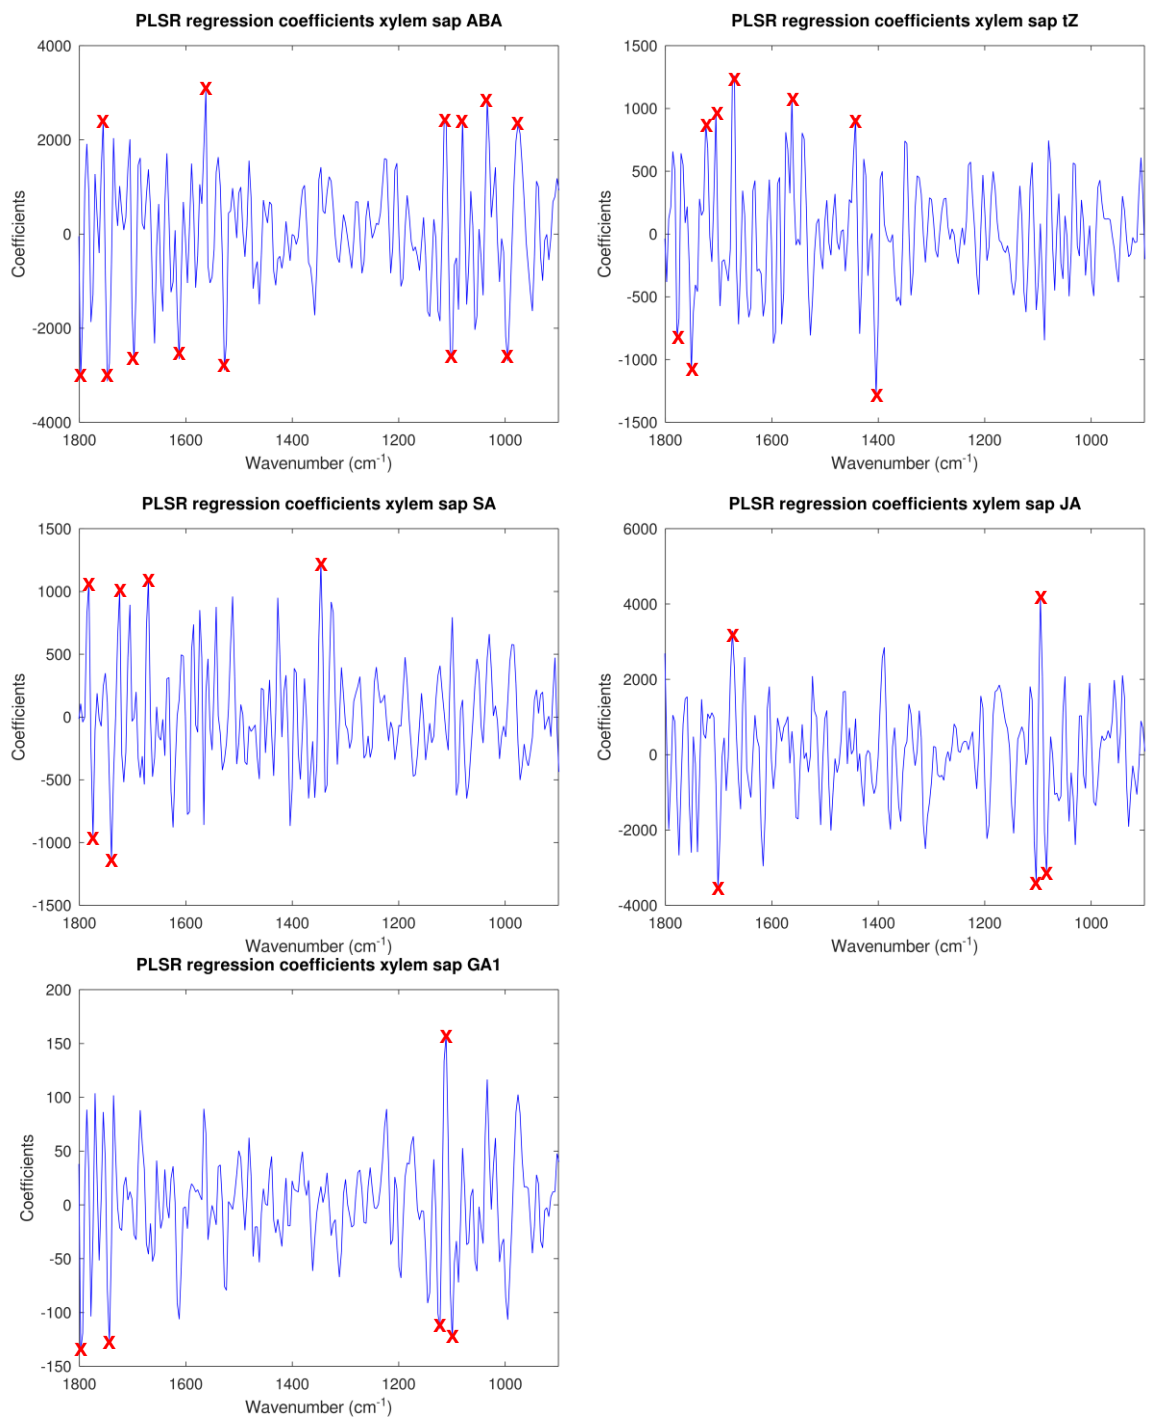

**Figure S8:** PLSR regression coefficients for prediction of plant hormones from xylem sap. Main wavenumbers are marked with a red X.

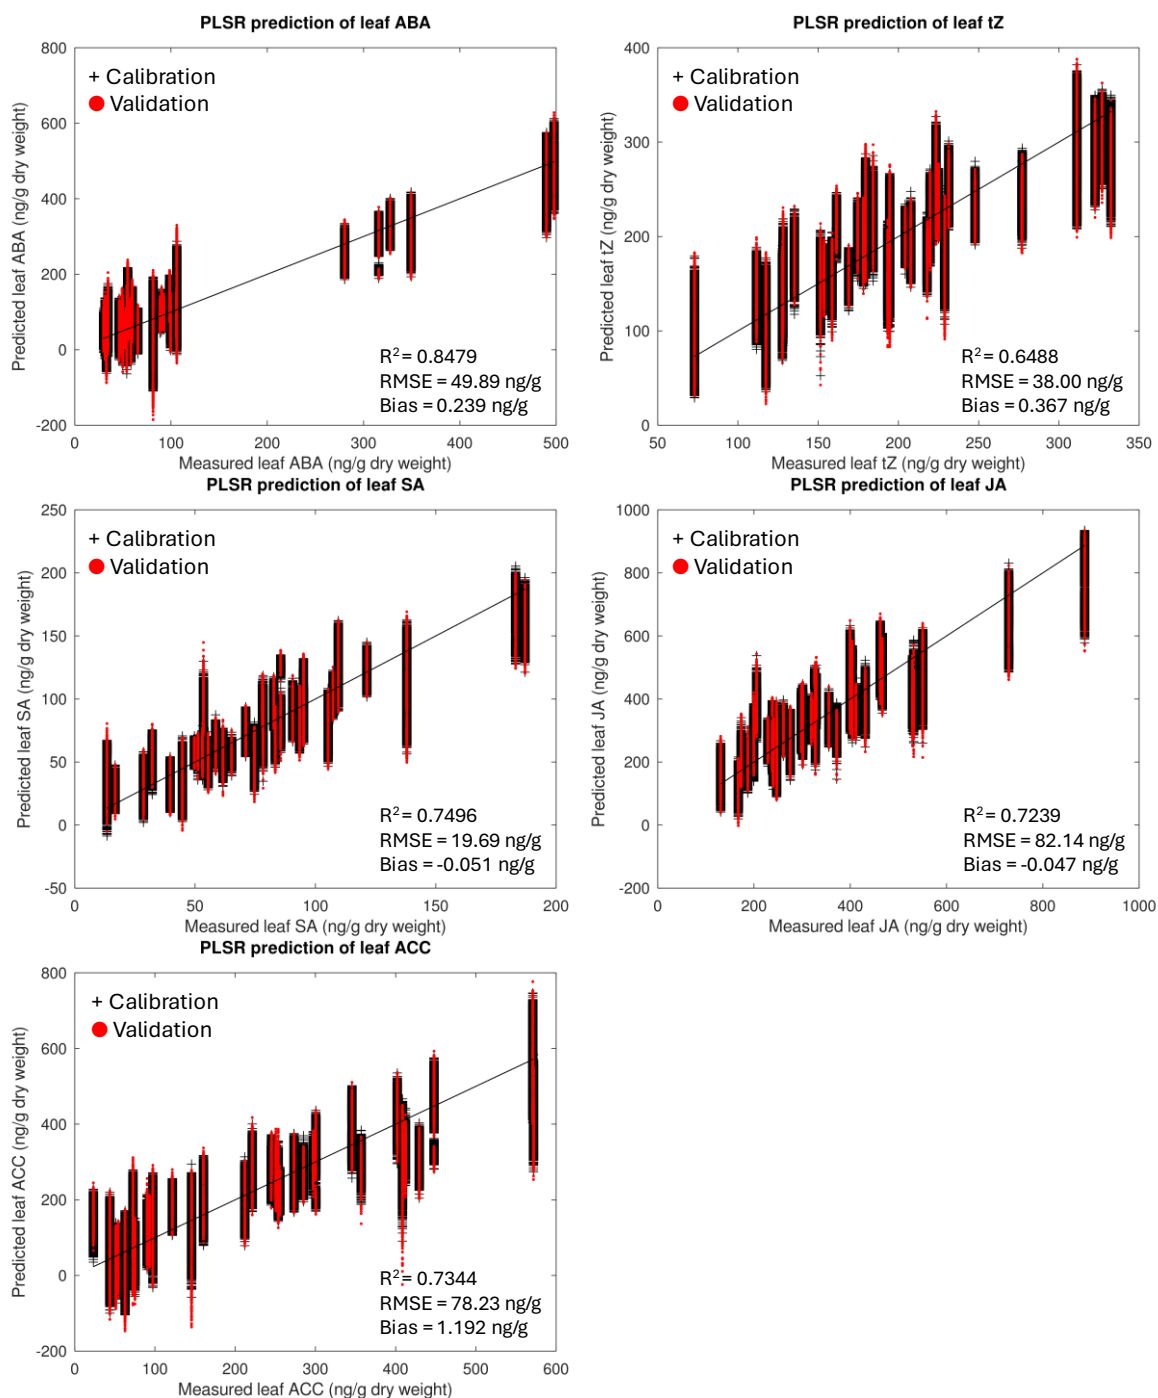

**Figure S9:** PLS regression graphs for prediction of plant hormones from freeze-dried ground leaves. Validation was performed by Monte-Carlo cross-validation with 20% of samples left-out for validation during 1000 iterations. All models were built using 10 latent variables.

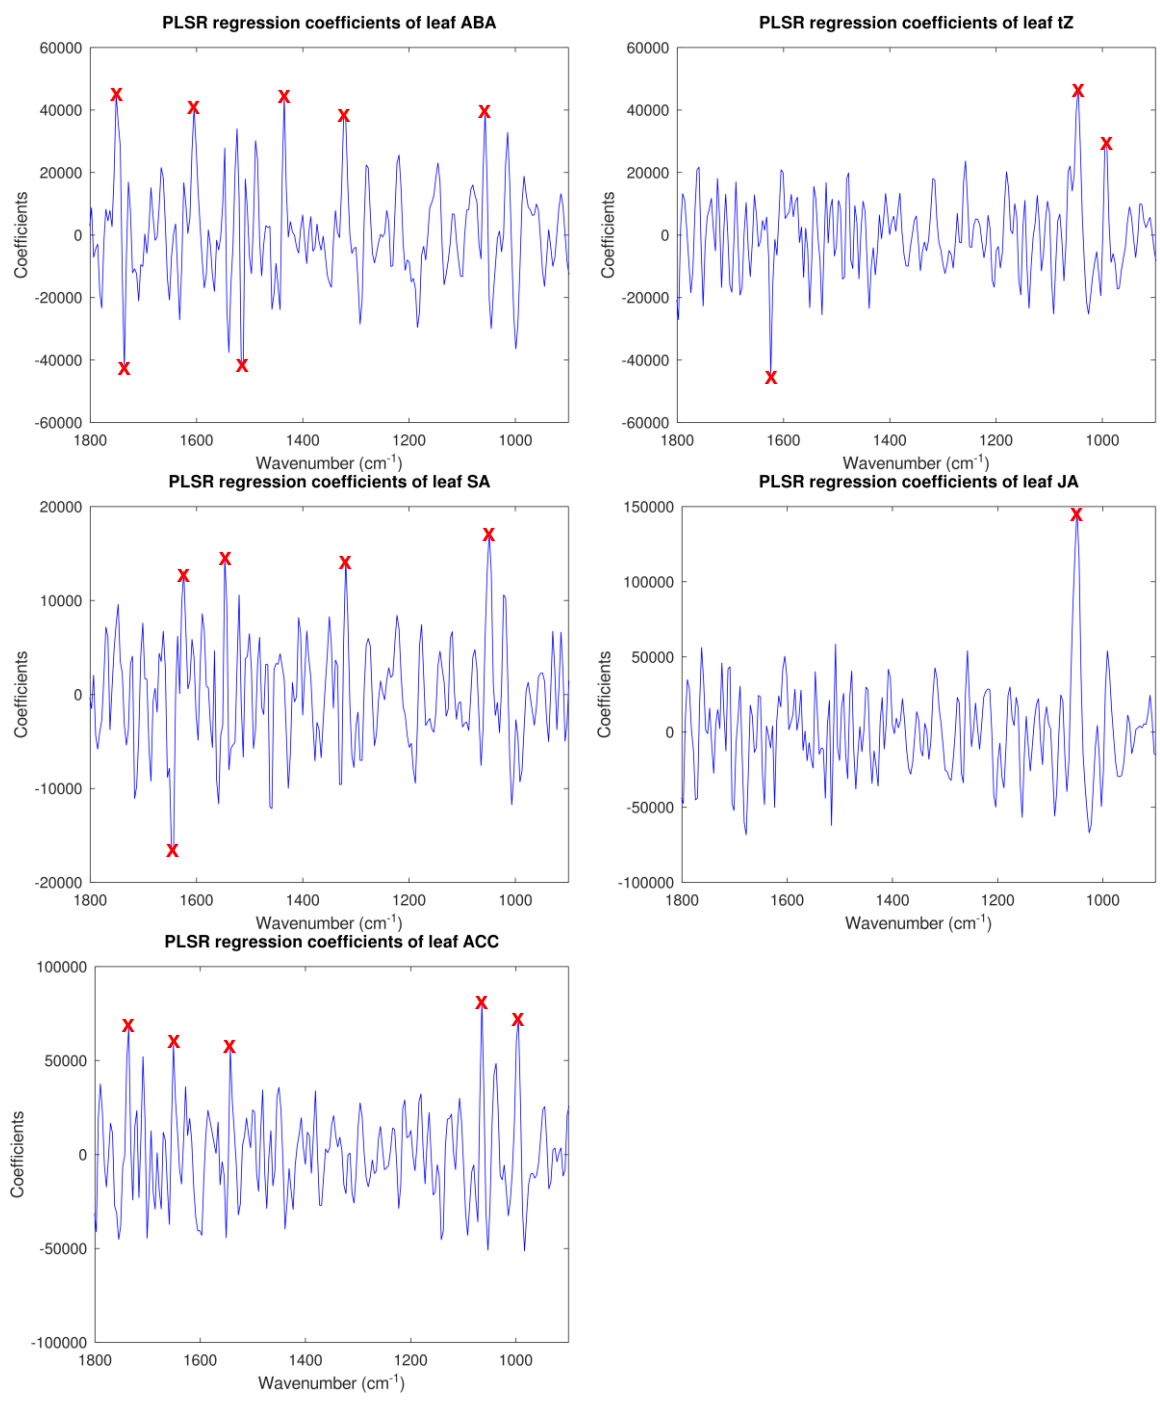

**Figure S10:** PLSR regression coefficients for prediction of plant hormones from freeze-dried ground leaves. Main wavenumbers are marked with a red X.

| Xylem Sap Number of LVs | tz | iP | GA1 | GA3 | GA4 | IAA | ABA | JA | SA |
|-------------------------|----|----|-----|-----|-----|-----|-----|----|----|
| Light Control           | 6  | 8  | 9   | NA  | 6   | 6   | 8   | 7  | 7  |
| Light Drought           | 9  | 4  | 10  | 9   | NA  | NA  | 10  | 10 | 9  |
| Light Nitrogen          | 6  | 4  | 8   | 5   | NA  | NA  | 6   | 5  | 5  |
| Light Low Nutrient      | 7  | 7  | 9   | NA  | NA  | NA  | 9   | 7  | 10 |
| Shade Control           | 7  | 6  | 5   | 5   | NA  | NA  | 4   | 4  | 4  |
| Shade Drought           | 3  | NA | 5   | 7   | NA  | NA  | 5   | 7  | 7  |
| Shade Nitrogen          | 7  | 7  | 7   | 5   | NA  | 6   | 7   | 6  | 7  |
| Shade Low Nutrient      | 7  | NA | 7   | NA  | NA  | NA  | 7   | 6  | 6  |

| FDG Leaves Number of LVs | ACC | tz | ABA | JA | SA |
|--------------------------|-----|----|-----|----|----|
| Light Control            | 5   | 5  | 7   | 5  | 5  |
| Light Drought            | 7   | 7  | 7   | 6  | 9  |
| Light Nitrogen           | 8   | 8  | 9   | 7  | 7  |
| Light Low Nutrient       | 5   | 4  | 4   | 5  | 5  |
| Shade Control            | 3   | 5  | 2   | 4  | 4  |
| Shade Drought            | 5   | 5  | 5   | 5  | 4  |
| Shade Nitrogen           | 4   | 4  | 4   | 5  | 3  |
| Shade Low Nutrient       | 7   | 6  | 6   | 8  | 6  |

**Table S6:** Number of latent variables (LVs) used to build the PLSR models between different types of treatment and hormone levels for xylem sap and freeze-dried ground (FDG) leaves. Higher number of LVs represents higher model complexity.
